# Supplementary material
Source: Springer Nature journal article supplement (https://www.springermedizin.de/resource/supplementary/13041_2014_291_MOESM13_ESM.pdf/25657922)

A

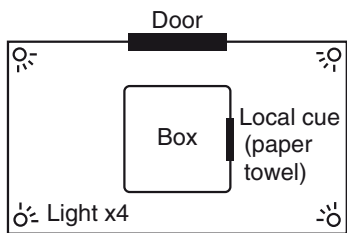

B

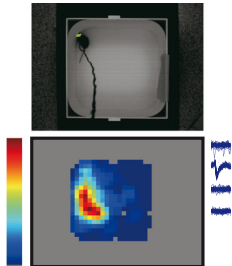

C

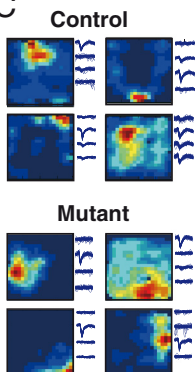

D

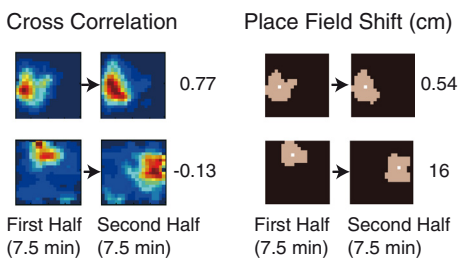

E

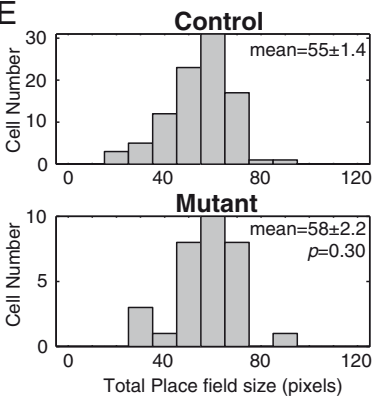

F

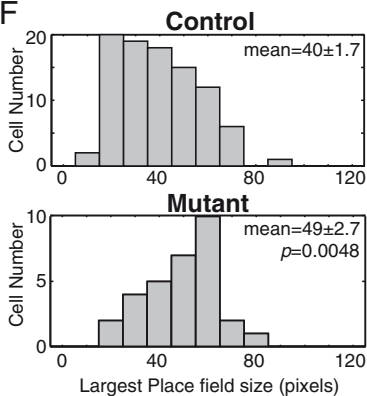

G

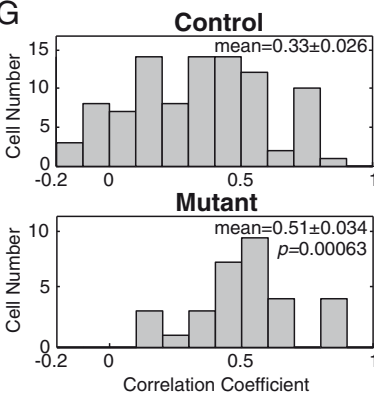

H

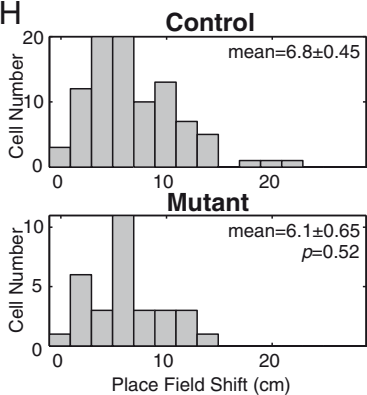

Supplement: MOESM13 [file 25657922]
